# Supplementary material for: Biofabrication of Modular Spheroids as Tumor‐Scale Microenvironments for Drug Screening
Source: PubMed Central journal article supplement — Adv Healthc Mater. 2022 Dec 25;12(14):2201581. doi: 10.1002/adhm.202201581 (PMC11468982; doi:10.1002/adhm.202201581), 2022-12-25
Supplement: ADHM-12-2201581-s001.pdf [file ADHM-12-2201581-s001.pdf]

# ADVANCED HEALTHCARE MATERIALS

## Supporting Information

for *Adv. Healthcare Mater.*, DOI 10.1002/adhm.202201581

Biofabrication of Modular Spheroids as Tumor-Scale Microenvironments for Drug Screening

*Naveen Vijayan Makhileri, Gretel Major, Khoon Lim, Isha Mutreja, Kenny Chitcholtan, Elisabeth Phillips, Gary Hooper and Tim Woodfield\**

## **Supplementary Information:**

### **Using Automated 3D Bioassembly of Modular Tissue Units to Increase the Predictive Power of Preclinical Cancer Models in Drug Discovery**

Naveen Vijayan Mekhileri<sup>1†</sup>, Gretel Major<sup>1†</sup>, Khoon Lim<sup>1</sup>, Isha Mutreja<sup>1</sup>, Kenny Chitcholtan<sup>2</sup>,  
Elisabeth Phillips<sup>3</sup>, Gary Hooper<sup>1</sup> and Tim Woodfield<sup>1\*</sup>

This PDF file includes:

Figs. S1 – S4  
Table S1

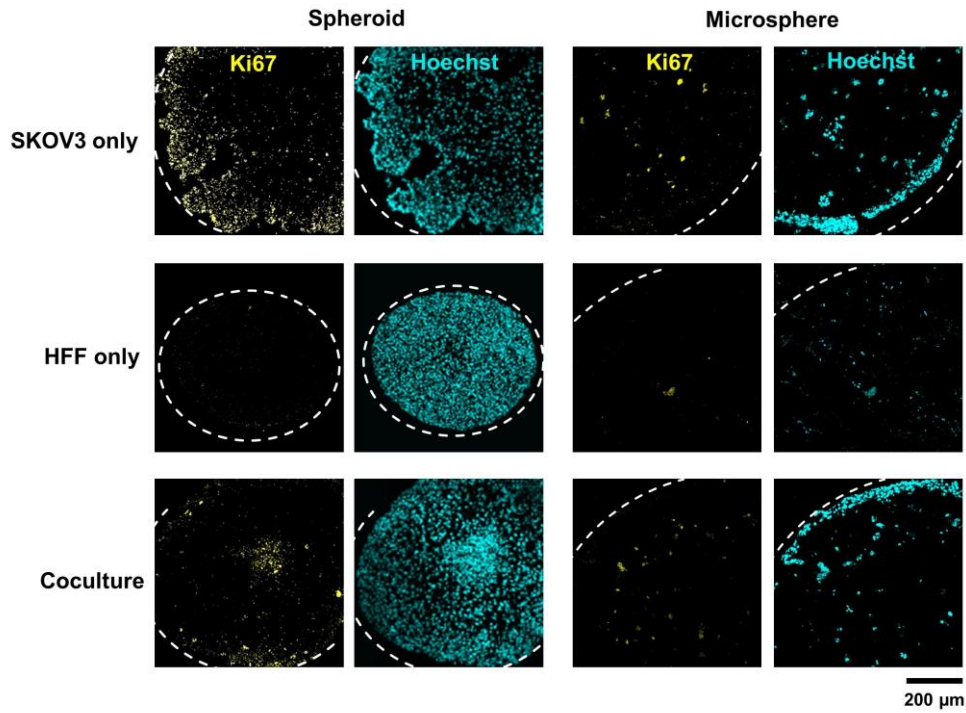

**Figure S1.** Proliferation marker (Ki67, yellow) and nuclei (Hoechst 33342, blue) of ovarian carcinoma spheroid and microsphere units. Dotted lines represent the edge of each tumour unit.

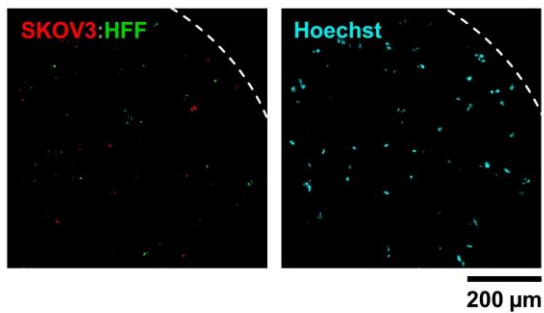

**Figure S2.** Cell distribution within coculture microspheres. SKOV3 (Qtracker 800, red) and HFF (Qtracker 655, green) cells positioned throughout microsphere. Total nuclei visible via Hoechst 33342 (blue).

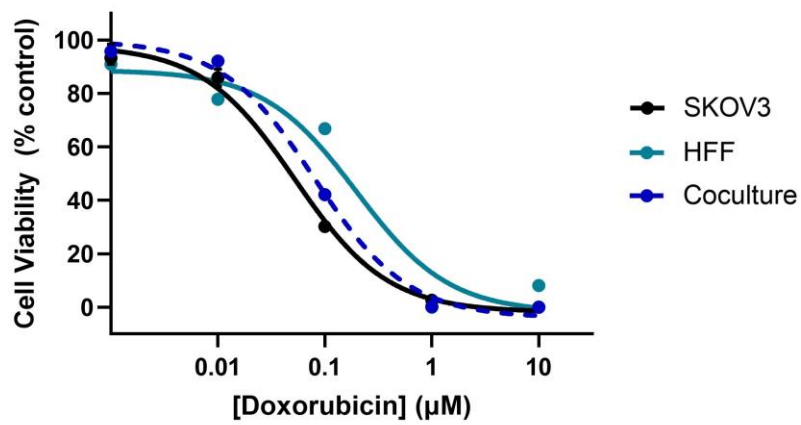

**Figure S3. Chemosensitivity of 2D cultured ovarian carcinoma models.** Dose response curves of doxorubicin on cell viability (n=3). Error bars represent  $\pm$  standard deviation.

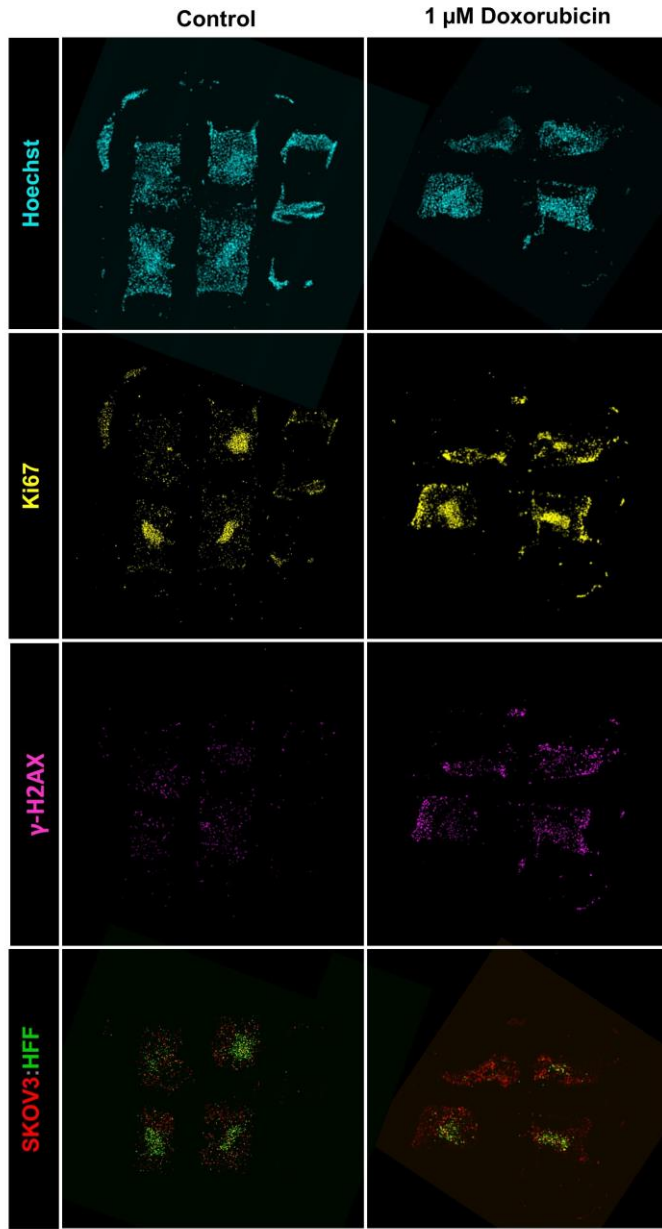

500  $\mu$ m

**Figure S4. Immunofluorescence imaging of whole bioassembled SKOV3:HFF coculture spheroids with or without treatment with 1  $\mu$ M doxorubicin.** Cell nuclei (Hoechst, blue), cell proliferation marker (Ki67, yellow), DNA double-strand breaks ( $\gamma$ -H2AX , pink) and cell distribution of SKOV3 (Qtracker 800, red) and HFF (Qtracker 655, green) cells.

**Table S1. Total cell number encapsulated in 10% Gel-MA microspheres (n=3)**

|                                 | Cells          |                |                |
|---------------------------------|----------------|----------------|----------------|
|                                 | SKOV3          | HFF            | Coculture      |
| <b>Cells per microsphere</b>    | 5829 $\pm$ 263 | 6168 $\pm$ 159 | 5610 $\pm$ 540 |
| <b>Coefficient of variation</b> | 0.045          | 0.025          | 0.096          |
